# Supplementary material
Source: PubMed Central journal article supplement (PMC7335740)

YMTHE, Volume 28

## **Supplemental Information**

### **Comprehensive Molecular Profiles of Functionally Effective MSC-Derived Extracellular Vesicles in Immunomodulation**

**Hyemee Kim, Min Joung Lee, Eun-Hye Bae, Jin Suk Ryu, Gagandeep Kaur, Hyeon Ji Kim, Jun Yeob Kim, Heather Barreda, Sung Youn Jung, Jong Min Choi, Taeko Shigemoto-Kuroda, Joo Youn Oh, and Ryang Hwa Lee**

**Supplemental Table 1.** KEGG pathway ranking summary of predicted targets of let-7b-5p and miR-21a-5p.

| TERM                                        | TERM_ID | TOTAL_GENES_OF_THE_TERM | UNION_TARGETS_IN_THE_TERM | MIRS_IN_THE_TERM | SCORE |
|---------------------------------------------|---------|-------------------------|---------------------------|------------------|-------|
| MAPK_SIGNALING_PATHWAY                      | 4010    | 271                     | 39                        | 2                | 6.802 |
| PATHWAYS_IN_CANCER                          | 5200    | 323                     | 35                        | 2                | 3.962 |
| NEUROTROPHIN_SIGNALING_PATHWAY              | 4722    | 131                     | 17                        | 2                | 3.229 |
| AXON_GUIDANCE                               | 4360    | 131                     | 18                        | 2                | 3.137 |
| JAK-STAT_SIGNALING_PATHWAY                  | 4630    | 153                     | 18                        | 2                | 2.698 |
| TGF-BETA_SIGNALING_PATHWAY                  | 4350    | 85                      | 11                        | 2                | 2.533 |
| FOCAL_ADHESION                              | 4510    | 197                     | 21                        | 2                | 2.424 |
| CYTOKINE-CYTOKINE_RECEPTOR_INTERACTION      | 4060    | 262                     | 20                        | 2                | 2.195 |
| MELANOMA                                    | 5218    | 71                      | 11                        | 2                | 2.173 |
| ENDOCYTOSIS                                 | 4144    | 219                     | 19                        | 2                | 2.113 |
| COLORECTAL_CANCER                           | 5210    | 65                      | 9                         | 2                | 2.07  |
| WNT_SIGNALING_PATHWAY                       | 4310    | 153                     | 16                        | 2                | 2.048 |
| INSULIN_SIGNALING_PATHWAY                   | 4910    | 137                     | 15                        | 2                | 1.996 |
| REGULATION_OF_ACTIN_CYTOSKELETON            | 4810    | 215                     | 17                        | 2                | 1.906 |
| NOTCH_SIGNALING_PATHWAY                     | 4330    | 49                      | 7                         | 2                | 1.835 |
| PROSTATE_CANCER                             | 5215    | 89                      | 11                        | 2                | 1.835 |
| CHEMOKINE_SIGNALING_PATHWAY                 | 4062    | 187                     | 15                        | 2                | 1.785 |
| ENDOMETRIAL_CANCER                          | 5213    | 52                      | 8                         | 2                | 1.756 |
| MTOR_SIGNALING_PATHWAY                      | 4150    | 53                      | 8                         | 2                | 1.756 |
| PANCREATIC_CANCER                           | 5212    | 70                      | 9                         | 2                | 1.748 |
| GLIOMA                                      | 5214    | 65                      | 9                         | 2                | 1.71  |
| BASAL_CELL_CARCINOMA                        | 5217    | 55                      | 8                         | 2                | 1.683 |
| T_CELL_RECEPTOR_SIGNALING_PATHWAY           | 4660    | 109                     | 10                        | 2                | 1.663 |
| UBIQUITIN_MEDIATED_PROTEOLYSIS              | 4120    | 138                     | 11                        | 2                | 1.653 |
| CHAGAS_DISEASE                              | 5142    | 102                     | 9                         | 2                | 1.615 |
| PROTEIN_PROCESSING_IN_ENDOPLASMIC_RETICULUM | 4141    | 167                     | 12                        | 2                | 1.585 |
| TOXOPLASMOSIS                               | 5145    | 128                     | 12                        | 2                | 1.577 |
| CHRONIC_MYELOID_LEUKEMIA                    | 5220    | 73                      | 9                         | 2                | 1.548 |
| BLADDER_CANCER                              | 5219    | 42                      | 6                         | 1                | 1.427 |
| ADIPOCYTOKINE_SIGNALING_PATHWAY             | 4920    | 68                      | 7                         | 2                | 1.424 |
| GNRH_SIGNALING_PATHWAY                      | 4912    | 99                      | 9                         | 2                | 1.395 |

|                                                          |      |     |    |   |       |
|----------------------------------------------------------|------|-----|----|---|-------|
| AMOEBIASIS                                               | 5146 | 115 | 11 | 2 | 1.387 |
| MELANOGENESIS                                            | 4916 | 100 | 10 | 2 | 1.382 |
| SPLICEOSOME                                              | 3040 | 126 | 7  | 2 | 1.365 |
| B_CELL_RECEPTOR_SIGNALING_PATHWAY                        | 4662 | 76  | 7  | 2 | 1.348 |
| ERBB_SIGNALING_PATHWAY                                   | 4012 | 87  | 9  | 2 | 1.345 |
| BACTERIAL_INVASION_OF_EPITHELIAL_CELLS                   | 5100 | 71  | 6  | 2 | 1.338 |
| PROTEIN_DIGESTION_AND_ABSORPTION                         | 4974 | 75  | 8  | 2 | 1.328 |
| HEPATITIS_C                                              | 5160 | 137 | 8  | 2 | 1.248 |
| BASAL_TRANSCRIPTION_FACTORS                              | 3022 | 36  | 4  | 2 | 1.192 |
| TYPE_II_DIABETES_MELLITUS                                | 4930 | 49  | 6  | 2 | 1.191 |
| SMALL_CELL_LUNG_CANCER                                   | 5222 | 85  | 8  | 2 | 1.185 |
| APOPTOSIS                                                | 4210 | 86  | 7  | 2 | 1.173 |
| PROGESTERONE-MEDIATED_OOCYTE_MATURATION                  | 4914 | 87  | 7  | 2 | 1.162 |
| P53_SIGNALING_PATHWAY                                    | 4115 | 69  | 7  | 2 | 1.149 |
| VEGF_SIGNALING_PATHWAY                                   | 4370 | 76  | 7  | 2 | 1.129 |
| NATURAL_KILLER_CELL_MEDIATED_CYTOTOXICITY                | 4650 | 150 | 10 | 2 | 1.122 |
| NON-SMALL_CELL_LUNG_CANCER                               | 5223 | 54  | 6  | 2 | 1.102 |
| RENAL_CELL_CARCINOMA                                     | 5211 | 71  | 7  | 2 | 1.088 |
| TYPE_I_DIABETES_MELLITUS                                 | 4940 | 59  | 4  | 2 | 1.076 |
| RIG-I-LIKE_RECEPTOR_SIGNALING_PATHWAY                    | 4622 | 69  | 5  | 2 | 1.072 |
| FC_GAMMA_R-MEDIATED_PHAGOCYTOSIS                         | 4666 | 90  | 8  | 2 | 1.071 |
| ACUTE_MYELOID_LEUKEMIA                                   | 5221 | 57  | 6  | 2 | 1.063 |
| ADHERENS_JUNCTION                                        | 4520 | 74  | 7  | 2 | 1.051 |
| GLYCOSPHINGOLIPID_BIOSYNTHESIS_LACTO_AND_NEOLACTO_SERIES | 601  | 26  | 4  | 2 | 1.043 |
| GLYCEROPHOSPHOLIPID_METABOLISM                           | 564  | 79  | 7  | 2 | 1.03  |
| PPAR_SIGNALING_PATHWAY                                   | 3320 | 80  | 6  | 2 | 1.019 |
| FC_EPSILON_RI_SIGNALING_PATHWAY                          | 4664 | 80  | 7  | 2 | 0.986 |
| ALLOGRAFT_REJECTION                                      | 5330 | 52  | 4  | 2 | 0.933 |
| CELL_ADHESION_MOLECULES_(CAMS)                           | 4514 | 149 | 2  | 2 | 0.927 |
| TOLL-LIKE_RECEPTOR_SIGNALING_PATHWAY                     | 4620 | 101 | 7  | 2 | 0.921 |
| HEDGEHOG_SIGNALING_PATHWAY                               | 4340 | 54  | 5  | 2 | 0.91  |

|                                                |      |     |    |   |       |
|------------------------------------------------|------|-----|----|---|-------|
| LONG-TERM DEPRESSION                           | 4730 | 72  | 6  | 1 | 0.891 |
| CELL CYCLE                                     | 4110 | 125 | 7  | 2 | 0.873 |
| LYSOSOME                                       | 4142 | 121 | 8  | 1 | 0.843 |
| LEUKOCYTE_TRANSENDOTHELIAL_MIGRATION           | 4670 | 120 | 3  | 2 | 0.831 |
| NOD-LIKE_RECEPTOR_SIGNALING_PATHWAY            | 4621 | 62  | 5  | 2 | 0.831 |
| AMYOTROPHIC_LATERAL_SCLEROSIS (ALS)            | 5014 | 56  | 5  | 2 | 0.83  |
| ECM-RECEPTOR INTERACTION                       | 4512 | 83  | 6  | 2 | 0.796 |
| CALCIUM SIGNALING PATHWAY                      | 4020 | 178 | 10 | 1 | 0.789 |
| NEUROACTIVE_LIGAND-RECEPTOR INTERACTION        | 4080 | 320 | 12 | 2 | 0.781 |
| LYSINE DEGRADATION                             | 310  | 43  | 4  | 2 | 0.753 |
| SYSTEMIC_LUPUS_ERYTHEMATOSUS                   | 5322 | 150 | 3  | 2 | 0.746 |
| ALDOSTERONE-REGULATED_SODIUM_REABSORPTION      | 4960 | 44  | 4  | 2 | 0.742 |
| PHAGOSOME                                      | 4145 | 174 | 4  | 2 | 0.74  |
| HYPERTROPHIC_CARDIOMYOPATHY (HCM)              | 5410 | 87  | 6  | 1 | 0.738 |
| ABC TRANSPORTERS                               | 2010 | 45  | 4  | 2 | 0.731 |
| GALACTOSE METABOLISM                           | 52   | 27  | 3  | 2 | 0.729 |
| PHOSPHATIDYLINOSITOL_SIGNALING_SYSTEM          | 4070 | 78  | 5  | 2 | 0.727 |
| VASCULAR_SMOOTH_MUSCLE_CONTRACTION             | 4270 | 133 | 7  | 2 | 0.72  |
| VIRAL MYOCARDITIS                              | 5416 | 89  | 6  | 1 | 0.72  |
| GLYCOSAMINOGLYCAN_BIOSYNTHESIS HEPARAN SULFATE | 534  | 26  | 3  | 1 | 0.719 |
| ALZHEIMER'S DISEASE                            | 5010 | 179 | 5  | 2 | 0.692 |
| LONG-TERM POTENTIATION                         | 4720 | 69  | 5  | 1 | 0.692 |
| O-GLYCAN BIOSYNTHESIS                          | 512  | 28  | 3  | 1 | 0.682 |
| HUNTINGTON'S DISEASE                           | 5016 | 189 | 2  | 1 | 0.655 |
| GRAFT-VERSUS-HOST DISEASE                      | 5332 | 54  | 3  | 2 | 0.654 |
| MALARIA                                        | 5144 | 54  | 4  | 2 | 0.654 |
| THYROID CANCER                                 | 5216 | 30  | 3  | 1 | 0.649 |
| PARKINSON'S DISEASE                            | 5012 | 141 | 1  | 1 | 0.63  |
| RNA TRANSPORT                                  | 3013 | 150 | 5  | 2 | 0.616 |
| LEISHMANIASIS                                  | 5140 | 65  | 4  | 2 | 0.592 |
| TIGHT JUNCTION                                 | 4530 | 135 | 5  | 2 | 0.592 |
| AUTOIMMUNE THYROID DISEASE                     | 5320 | 67  | 3  | 2 | 0.584 |
| HEMATOPOIETIC CELL LINEAGE                     | 4640 | 83  | 2  | 2 | 0.567 |

|                                                        |      |     |   |   |       |
|--------------------------------------------------------|------|-----|---|---|-------|
| PANCREATIC SECRETION                                   | 4972 | 105 | 4 | 2 | 0.543 |
| COMPLEMENT_AND_COAGULATION_CASCADES                    | 4610 | 76  | 2 | 2 | 0.541 |
| INOSITOL_PHOSPHATE_METABOLISM                          | 562  | 57  | 3 | 2 | 0.515 |
| PEROXISOME                                             | 4146 | 80  | 3 | 2 | 0.507 |
| RNA_DEGRADATION                                        | 3018 | 58  | 2 | 2 | 0.491 |
| CARBOHYDRATE_DIGESTION_AND_ABSORPTION                  | 4973 | 39  | 2 | 2 | 0.487 |
| INTESTINAL_IMMUNE_NETWORK_FOR_IGA_PRODUCTION           | 4672 | 44  | 3 | 1 | 0.486 |
| VASOPRESSIN-REGULATED_WATER_REABSORPTION               | 4962 | 43  | 2 | 2 | 0.482 |
| AMINO_SUGAR_AND_NUCLEOTIDE_SUGAR_METABOLISM            | 520  | 47  | 2 | 2 | 0.48  |
| OOCYTE_MEIOSIS                                         | 4114 | 112 | 5 | 1 | 0.443 |
| N-GLYCAN_BIOSYNTHESIS                                  | 510  | 50  | 3 | 1 | 0.442 |
| PURINE_METABOLISM                                      | 230  | 165 | 3 | 1 | 0.432 |
| BIOSYNTHESIS_OF_UNSATURATED_FATTY_ACIDS                | 1040 | 25  | 2 | 1 | 0.43  |
| CYTOSOLIC_DNA-SENSING_PATHWAY                          | 4623 | 55  | 3 | 1 | 0.412 |
| DILATED_CARDIOMYOPATHY                                 | 5414 | 89  | 4 | 1 | 0.408 |
| GAP_JUNCTION                                           | 4540 | 88  | 1 | 1 | 0.373 |
| ETHER_LIPID_METABOLISM                                 | 565  | 35  | 2 | 1 | 0.349 |
| PRION_DISEASES                                         | 5020 | 35  | 2 | 1 | 0.349 |
| SNARE_INTERACTIONS_IN_VESICULAR_TRANSPORT              | 4130 | 35  | 2 | 1 | 0.349 |
| ARRHYTHMOGENIC_RIGHT_VENTRICULAR_CARDIOMYOPATHY_(ARVC) | 5412 | 74  | 3 | 1 | 0.344 |
| SALIVARY_SECRETION                                     | 4970 | 77  | 3 | 1 | 0.338 |
| PYRIMIDINE_METABOLISM                                  | 240  | 98  | 3 | 1 | 0.321 |
| SPHINGOLIPID_METABOLISM                                | 600  | 41  | 2 | 1 | 0.32  |
| PENTOSE_PHOSPHATE_PATHWAY                              | 30   | 28  | 1 | 1 | 0.314 |
| GASTRIC_ACID_SECRETION                                 | 4971 | 73  | 1 | 1 | 0.312 |
| LINOLEIC_ACID_METABOLISM                               | 591  | 45  | 2 | 1 | 0.306 |
| BUTANOATE_METABOLISM                                   | 650  | 30  | 1 | 1 | 0.304 |
| ARACHIDONIC_ACID_METABOLISM                            | 590  | 86  | 2 | 1 | 0.3   |
| ALANINE_ASPARTATE_AND_GLUTAMATE_METABOLISM             | 250  | 32  | 1 | 1 | 0.295 |
| STAPHYLOCOCCUS_AUREUS_INFECTIION                       | 5150 | 51  | 2 | 1 | 0.292 |
| CARDIAC_MUSCLE_CONTRACTION                             | 4260 | 79  | 2 | 1 | 0.289 |

|                                                       |      |    |   |   |       |
|-------------------------------------------------------|------|----|---|---|-------|
| ARGININE_AND_PROLINE_METABOLISM                       | 330  | 53 | 2 | 1 | 0.288 |
| RETINOL_METABOLISM                                    | 830  | 77 | 2 | 1 | 0.287 |
| AMINOACYL-TRNA_BIOSYNTHESIS                           | 970  | 64 | 1 | 1 | 0.28  |
| FRUCTOSE_AND_MANNOSE_METABOLISM                       | 51   | 36 | 1 | 1 | 0.279 |
| CYSTEINE_AND_METHIONINE_METABOLISM                    | 270  | 38 | 1 | 1 | 0.272 |
| GLUTATHIONE_METABOLISM                                | 480  | 54 | 1 | 1 | 0.249 |
| GLYCEROLIPID_METABOLISM                               | 561  | 50 | 1 | 1 | 0.238 |
| FATTY_ACID_METABOLISM                                 | 71   | 47 | 1 | 1 | 0.232 |
| GLYCOLYSIS_GLUONEOGENESIS                             | 10   | 60 | 1 | 1 | 0.228 |
| STARCH_AND_SUCROSE_METABOLISM                         | 500  | 44 | 1 | 1 | 0.226 |
| NUCLEOTIDE_EXCISION_REPAIR                            | 3420 | 43 | 1 | 1 | 0.224 |
| GLYCOSYLPHOSPHATIDYLINOSITOL(GPI)-ANCHOR_BIOSYNTHESIS | 563  | 25 | 1 | 1 | 0.22  |
| ANTIGEN_PROCESSING_AND_PRESENTATION                   | 4612 | 78 | 1 | 1 | 0.217 |
| BASE_EXCISION_REPAIR                                  | 3410 | 38 | 1 | 1 | 0.217 |
| RNA_POLYMERASE                                        | 3020 | 28 | 1 | 1 | 0.216 |
| PHOTOTRANSDUCTION                                     | 4744 | 29 | 1 | 1 | 0.215 |
| CITRATE_CYCLE_(TCA_CYCLE)                             | 20   | 32 | 1 | 1 | 0.214 |
| GLYCINE_SERINE_AND_THREONINE_METABOLISM               | 260  | 34 | 1 | 1 | 0.214 |
| REGULATION_OF_AUTOPHAGY                               | 4140 | 35 | 1 | 1 | 0.214 |

**Supplemental Figure 1. Characterization of MSC-EVs isolated by a size exclusion chromatography method.** **a** Particle sizes of MSC conditioned medium and purified MSC-EVs were analyzed by nanoparticle tracking system. **b** Western blot assays with EVs and protein fractions using CD63, CD81, and CD9 antibodies. **c-d** Particle sizes and electron microscopy images of MSC-EVs before and after storage at  $-80^{\circ}\text{C}$ .

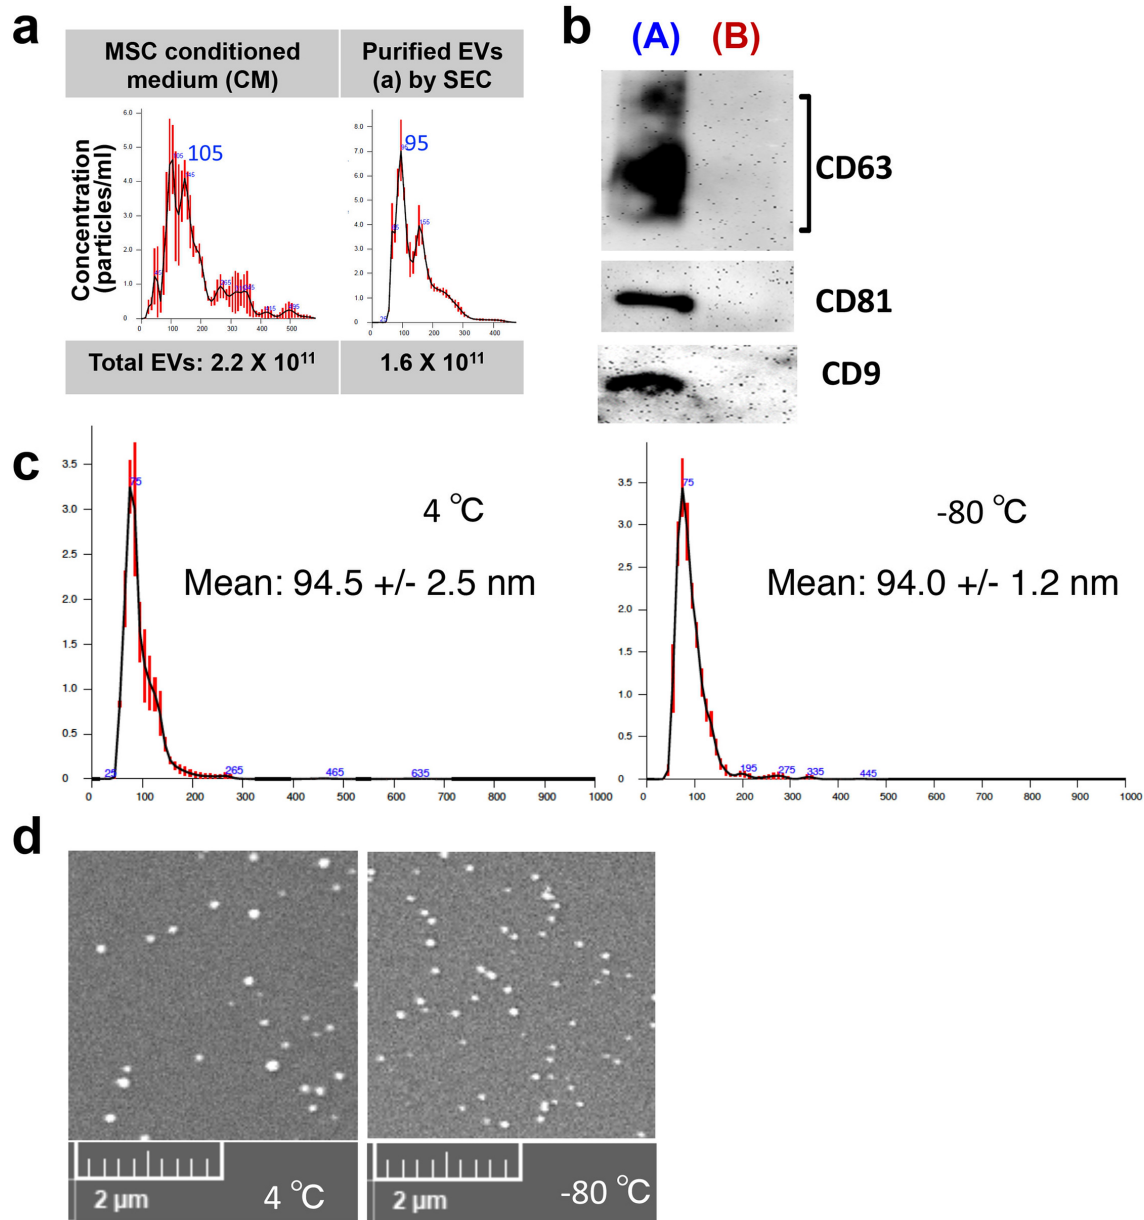

**Supplemental Figure 2. Supporting data for the results in Figure 6.** **a** Relative quantification (RQ) of TGFβ1, TGFβ1, PTX3 and Lum mRNAs in PD15 MSCs after target siRNAs transfection by RT-PCR assays. **b** RQ of TGFβ1 and PTX3 mRNAs in PD15 MSCs after target DNA plasmid transfection by RT-PCR assays. **c** RQ of TGFβ1 and PTX3 protein levels in EVs by ELISAs. EVs were isolated from PD15 MSCs after target DNA plasmid transfection. **d** IL-2 ELISA with conditioned medium of splenocytes activated by plate-bound anti-CD3 and **e** IL-17 ELISA with conditioned medium of LPS stimulated splenocytes for 24 h with EVs derived from PD15 MSCs transfected with target DNA plasmids (n=4). All data are presented as means ± SD.; \*p < 0.05, \*\*p < 0.01, \*\*\*p < 0.001, \*\*\*\*p < 0.0001 by one-way ANOVA with Tukey's test. **f** TGFβ1 and PTX3 ELISAs in conditioned medium of early-passage and late-passage MSCs (donor #7012). **g** TGFβ1 and PTX3 ELISAs in early-passage and late-passage MSC-EVs from donors # 7075 and # 6015 (n=3). Data are presented as means ± SD. \*p < 0.05, \*\*\*p < 0.001, \*\*\*\*p < 0.0001 by student's t-test. **h-i** Quantitative band-intensity of western blots in Figure 6i-k.

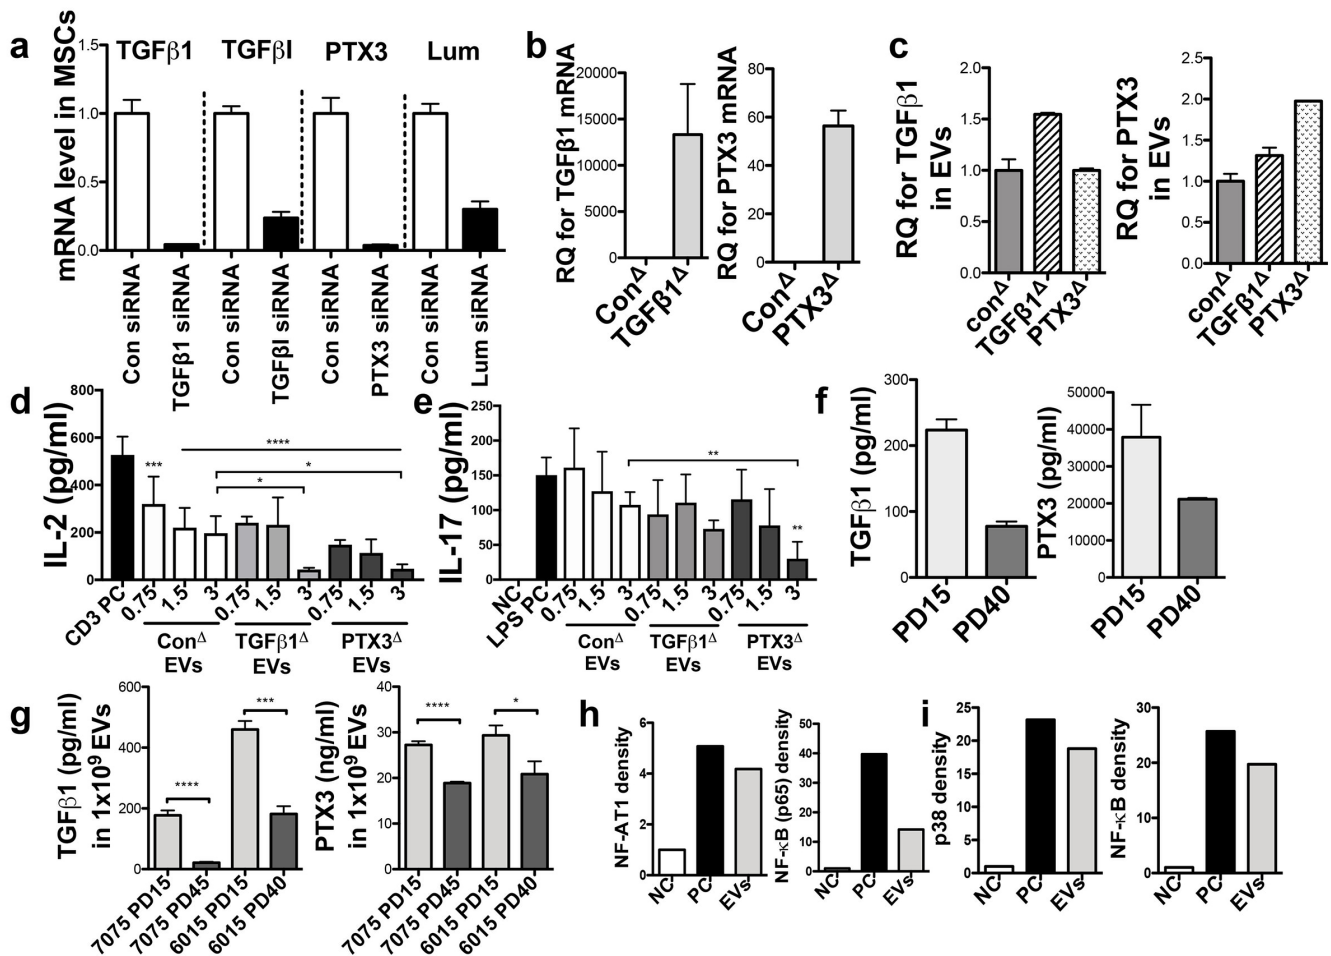



**Supplemental Figure 3. Supporting data for the results in Figure 7. a** Relative expressions of let-7b and miR-21 in early- and late-passage MSC-EVs from two additional donors #6015 and #7075. **b** Relative expressions of let-7b and miR-21 in PD15 MSCs and let-7b in PD15 MSC-EVs after miRNA inhibitor transfection. **c** TGFβ1 and PTX3 ELISAs with EVs isolated from PD15 MSCs after miRNA inhibitor transfection. All data are presented as means ± SD; \*p < 0.05 by Student's t-test or one-way ANOVA with Dunnett's test.

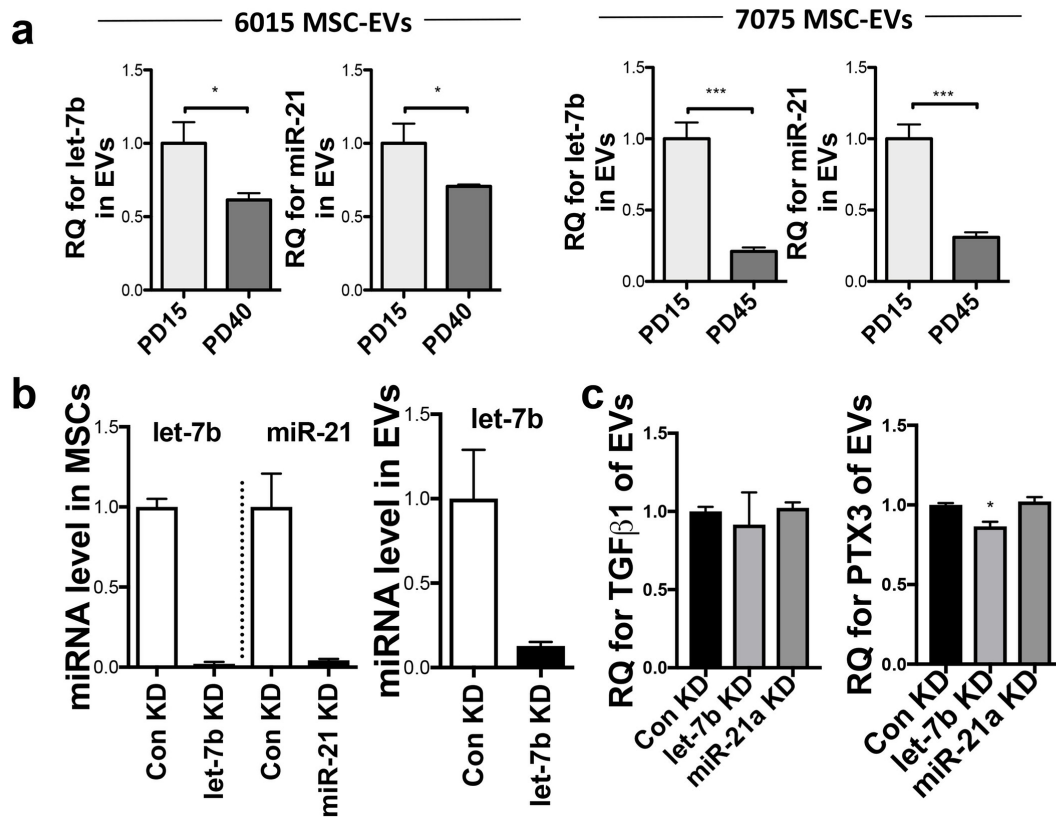

**Supplemental Figure 4. Characterization of early-passage and late-passage MSCs (donor #7012).** **a** Flow cytometry analysis with antibodies to the MSC surface markers (CD73, CD90 and CD105), HLAs (human leukocyte antigens) and hematopoietic marker CD34 in early-passage (PD15) and late-passage (PD40) MSCs. **b** Representative images of Oil red O and Alizarin Red staining after adipogenic and osteogenic differentiation induction with PD15 and PD40 MSCs. Both early- and late-passage MSCs expressed the MSC markers, but adipogenic differentiation potential of late passage MSCs was dramatically decreased.

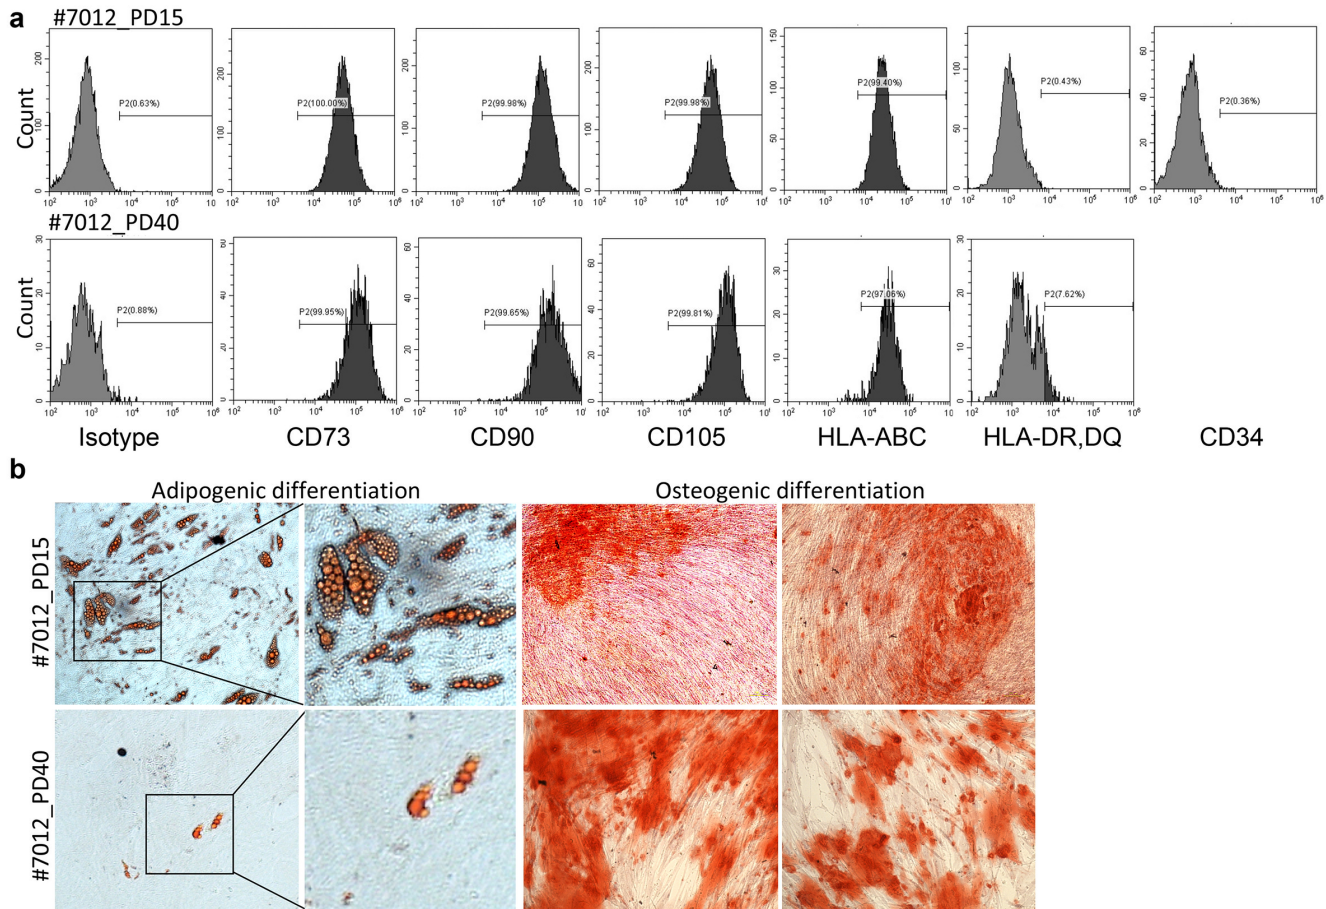

**Supplemental Figure 5. Karyotyping of early-passage (PD15) and late-passage (PD35) MSCs (donor #7012).** Both early- and late-passage MSCs showed normal diploid genotypes, but some early signs of instability (possible fusions and polyploidization) were also observed in late passage MSCs.

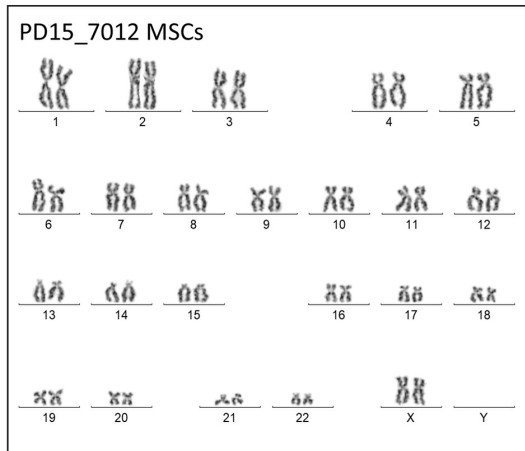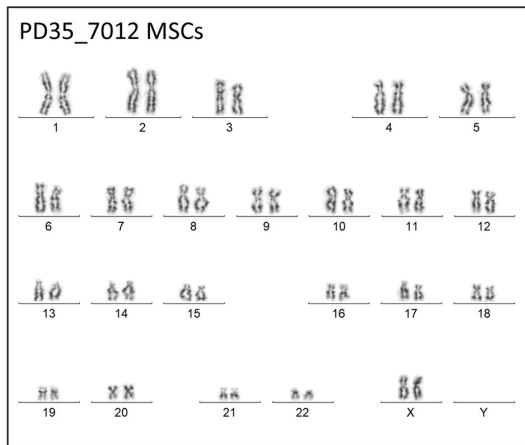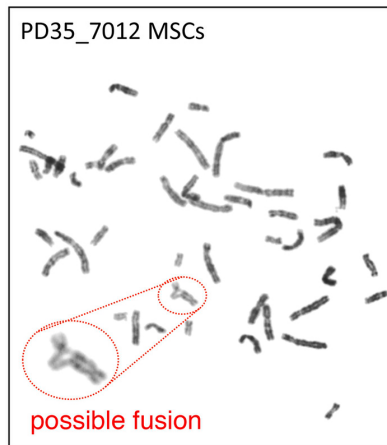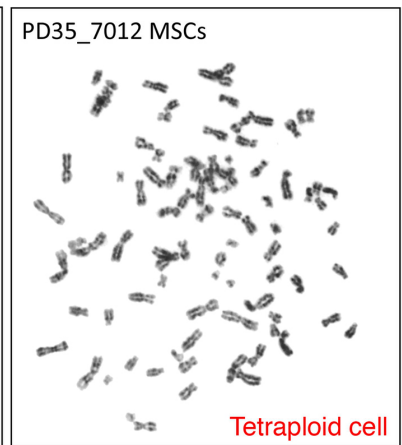

Supplement: mmc1.pdf [file mmc1.pdf]
